# Supplementary material
Source: publisher site journal article supplement (https://www.degruyter.com/publication/journal_key/ENG/downloadAsset/ENG_50th%20National%20Conference%20on%20Non-Destructive%20Testing.pdf)
Supplement: Supplementary file 1 [file ENG_50th%20National%20Conference%20on%20Non-Destructive%20Testing.pdf]

# THE 50TH NATIONAL CONFERENCE ON NON-DESTRUCTIVE TESTING (KKBN)

## GUEST EDITORS

### **Dr Dariusz Ulbrich**

Institute of Transport, Faculty of Civil and Transport Engineering, Poznan University of Technology (PUT), Poland

Email: [Dariusz.ulbrich@put.poznan.pl](mailto:Dariusz.ulbrich@put.poznan.pl)

### **Dr Grzegorz Psuj**

Department of Electrical and Computer Engineering, Faculty of Electrical Engineering, West Pomeranian University of Technology in Szczecin (ZUT), Poland

Email: [gpsuj@zut.edu.pl](mailto:gpsuj@zut.edu.pl)

## DESCRIPTION

National Conference on Non-Destructive Testing (KKBN) is an annual event which in 2023 will have its 50th edition. KKBN is the place to discuss the latest achievements in the field of non-destructive testing, as well as an inspiration to continue scientific work and the opportunity to establish new business relationships.

50th KKBN will be an opportunity for all participants to exchange knowledge and experience, familiarize with latest developments in the market of non-destructive testing and technical diagnostics. The special issue is devoted to publishing selected high quality peer-reviewed papers presented at the KKBN conference, covering a wide range of topics referring to non-destructive testing and evaluation, diagnostics and quality control.

Topics of interests include, but are not limited to:

- NDT in industry, construction, transport and energy sector.
- Methods, devices, equipment and software utilized in non-destructive testing.
- Technical diagnostics of devices and constructions.
- Training of NDT personnel & certification.
- New regulations and standards for non-destructive testing.
- Accreditation of NDT laboratories.

For questions related to the special issue in the Open Engineering Journal, please use [oe.50kkbn@kkbn.pl](mailto:oe.50kkbn@kkbn.pl). More information about the conference, such as deadlines and preliminary schedule, can be accessed at <http://www.kkbn.pl/> or by email [50kkbn@kkbn.pl](mailto:50kkbn@kkbn.pl) (Conference Office), [komitetnaukowy50kkbn@kkbn.pl](mailto:komitetnaukowy50kkbn@kkbn.pl) (Conference Scientific Committee).

We are looking forward to receiving your submission.

## HOW TO SUBMIT

Deadline: 31st December 2023

Manuscripts should be submitted to the journal via online submission system Editorial Manager available for this journal at: [www.editorialmanager.com/openeng](http://www.editorialmanager.com/openeng). When entering your submission please choose the option type of an article: "50th KKBN". In case of problems, please contact the Assistant Managing Editor of this journal at: [AssistantManagingEditor@degruyter.com](mailto:AssistantManagingEditor@degruyter.com)
